# Supplementary material for: First principles molecular dynamics calculations of the mechanical properties of endofullerenes containing noble gas atoms or small molecules
Source: Royal Society of Chemistry journal article supplement (doi:10.1039/d2cp00622g), 2022-01-01
Supplement: d2cp00622g3.pdf [file d2cp00622g3.pdf]

## Supplemental Material: "First principles molecular dynamics calculations of the mechanical properties of endofullerenes containing noble gas atoms or small molecules"

Laurent Pizzagalli

*Institut Pprime - CNRS UPR3346, Université de Poitiers, F86962 Chasseneuil Futuroscope Cedex, France\**

### S1. ENERGY|FORCE VERSUS STRAIN

The graphs below show the variations of total energy and contact force computed during the compression of various endofullerenes.

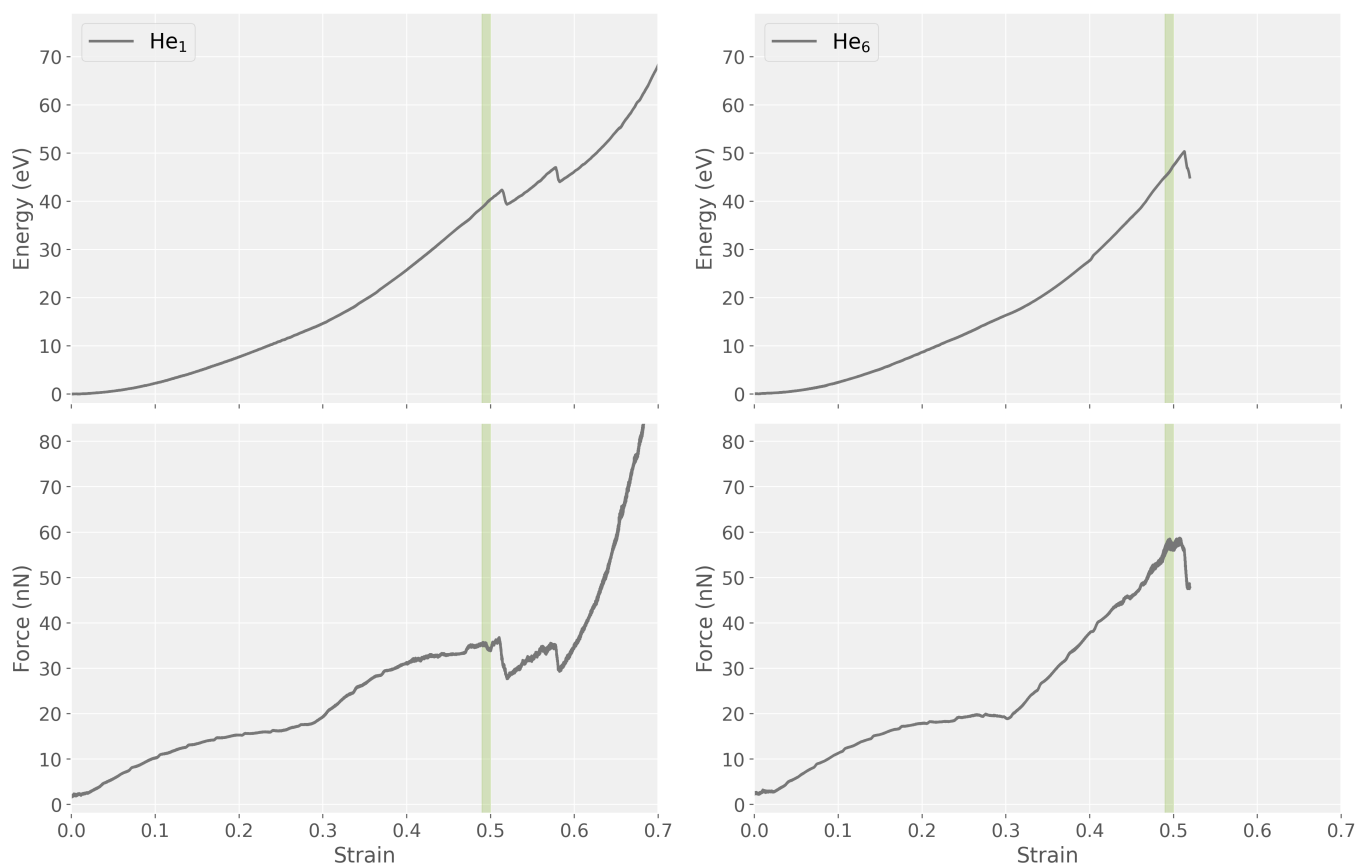

\* Laurent.Pizzagalli@univ-poitiers.fr

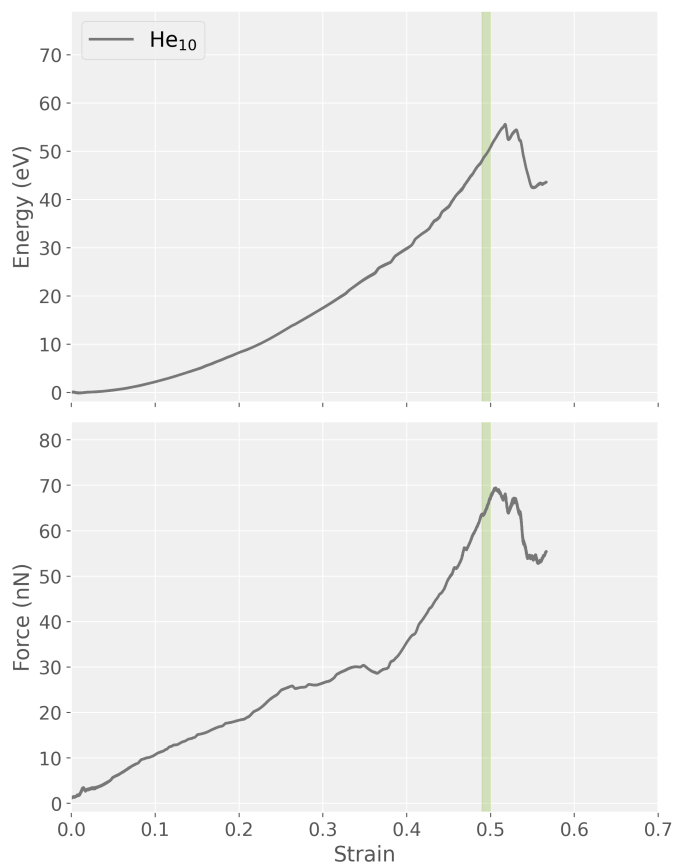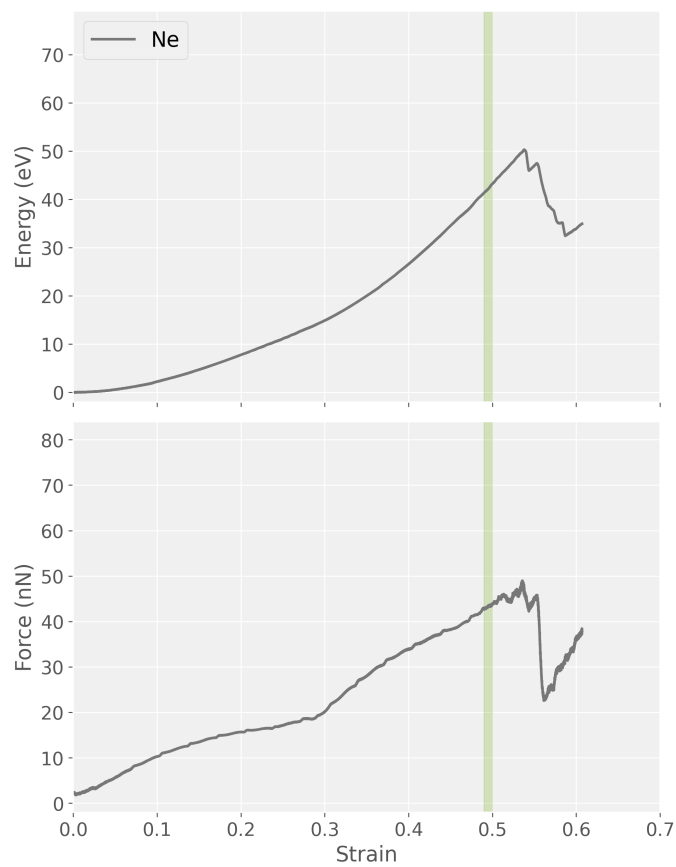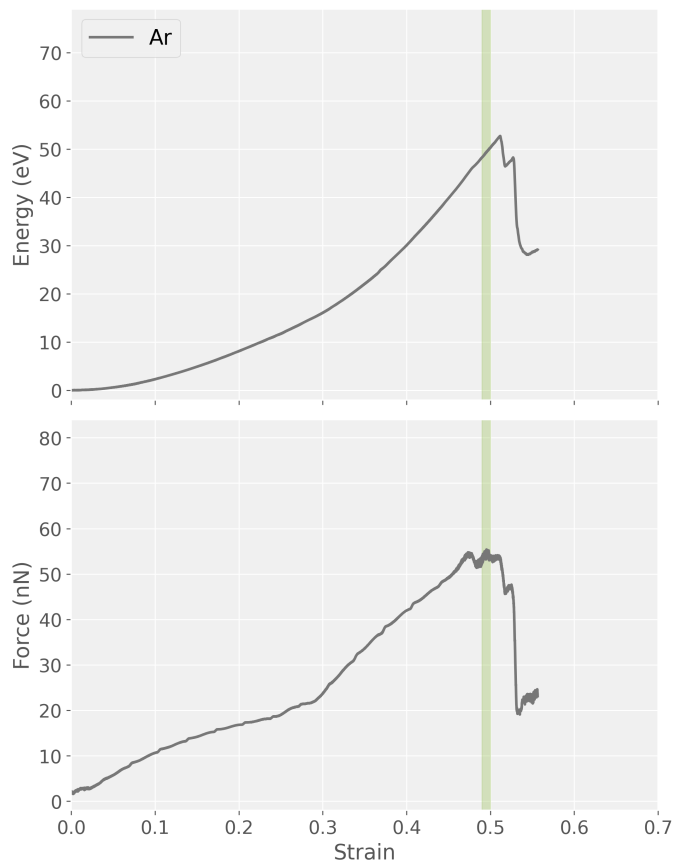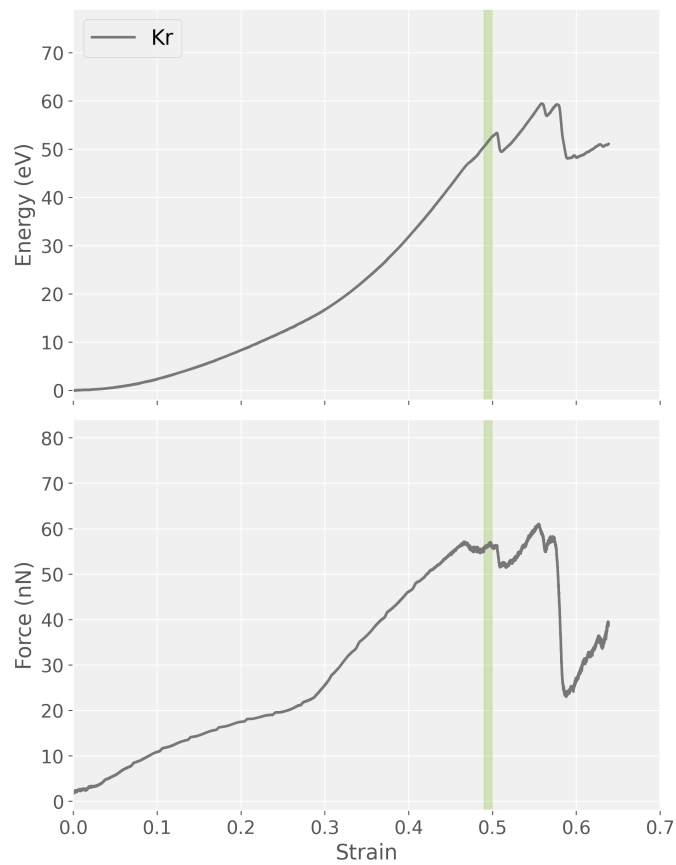

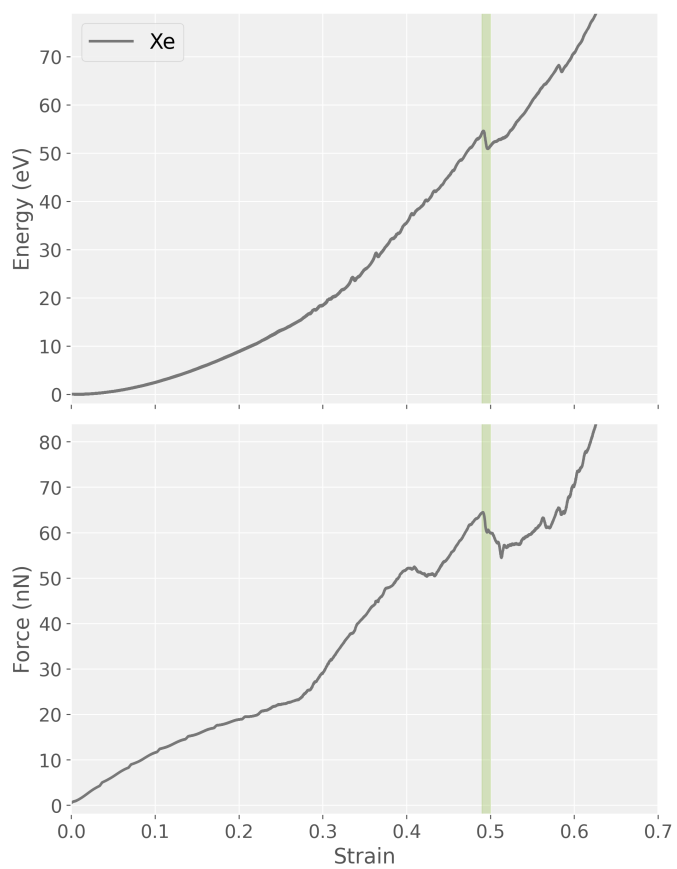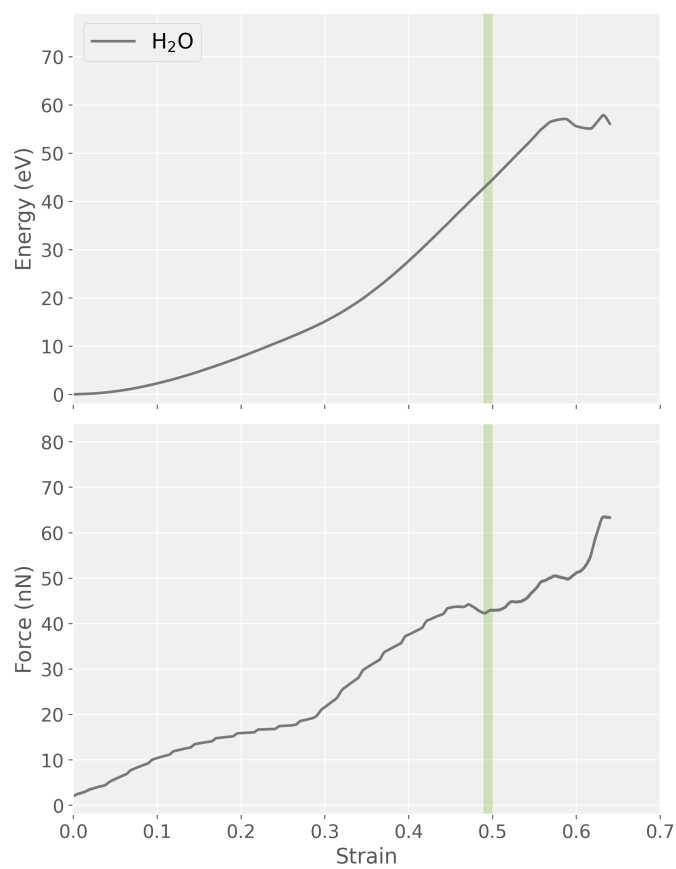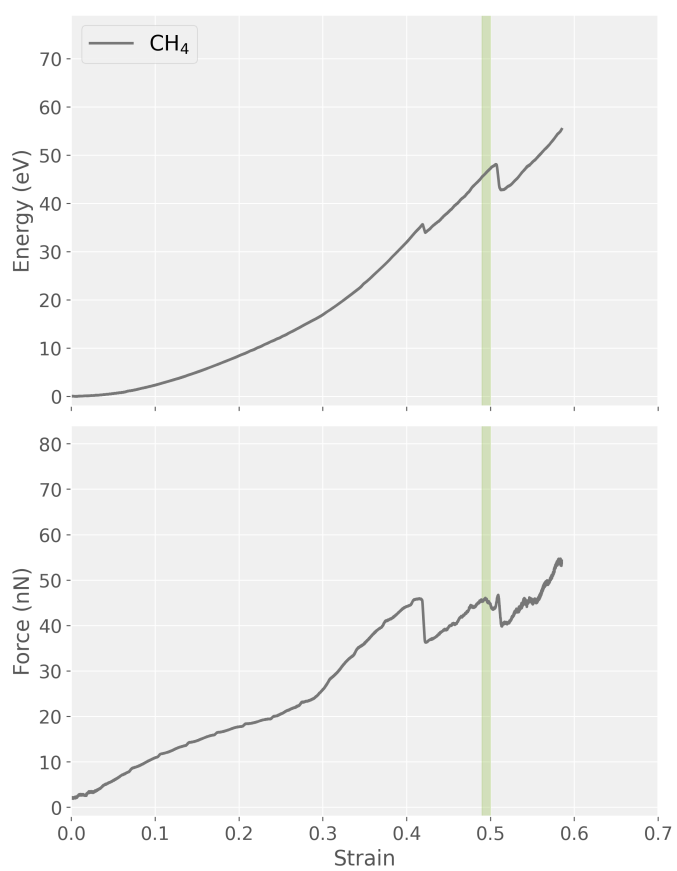

## S2. MOVIES

The movies "*H2O@C60.mp4*" and "*CH4@C60.mp4*" show the structures of H<sub>2</sub>O and CH<sub>4</sub> using ball-stick models during a uniaxial compression at 300 K.
